# Supplementary material for: A Chamber-Based Digital PCR Based on a Microfluidic Chip for the Absolute Quantification and Analysis of KRAS Mutation
Source: MDPI journal article supplement (doi:10.3390/bios13080778), 2023-08-01

# A Chamber-Based Digital PCR Based on a Microfluidic Chip for the Absolute Quantification and Analysis of KRAS Mutation

Jie Ren <sup>1,†</sup>, Gangwei Xu <sup>2,3,†</sup>, Hongna Liu <sup>1,†</sup>, Nongyue He <sup>1</sup>, Zhehao Zhao <sup>3</sup>, Meiling Wang <sup>1</sup>, Peipei Gu <sup>1</sup>, Zhu Chen <sup>1</sup>, Yan Deng <sup>1</sup>, Dongping Wu <sup>2,3,\*</sup> and Song Li <sup>1,4,\*</sup>

**Table S1 Reagents and instruments required for the construction of KRAS mutation gene detection system.**

| Reagent/instrument name            | Manufacturer/source                               |
|------------------------------------|---------------------------------------------------|
| Wild-type KRAS gene plasmid strain | Turtle Tech Ltd., Shanghai, China                 |
| Plasmid Midi Preparation Kit       | AxyPrep, Corning Life Sciences Co., Ltd           |
| Fast Site-Directed Mutagenesis Kit | Tiagen Biochemical Technology (Beijing) Co., Ltd. |
| Competent DH5 $\alpha$ strain      | Shanghai Shenggong Technology Co., Ltd            |
| Peptone                            | Sigma Aldrich, USA                                |
| Yeast extract                      | Sigma Aldrich, USA                                |
| NaCl                               | Sigma Aldrich, USA                                |
| Desktop small centrifuge           | DLAB Scientific Co., Ltd.                         |
| High speed centrifuge              | Thermo Fisher Scientific, USA                     |
| Thermostatic water bath            | Shanghai Lingfeng Chemical Reagent Co., Ltd.      |
| Pipette                            | Eppendorf, USA                                    |
| Thermostatic bacterial incubator   | Shanghai Heheng Instrument Equipment Co., Ltd.    |
| LB medium                          | Turtle Tech Ltd., Shanghai, China                 |

**Table S2. Main reagent materials and instruments in the chip preparation process.**

| Reagent/Instrument name         | Manufacturer                                       |
|---------------------------------|----------------------------------------------------|
| Concentrated sulfuric acid      | Sinopharm Chemical Reagent Co., Ltd.<br>(Shanghai) |
| Anhydrous ethanol               | Sinopharm Chemical Reagent Co., Ltd.<br>(Shanghai) |
| Acetone                         | Sinopharm Chemical Reagent Co., Ltd.<br>(Shanghai) |
| SU8-3050 photoresist            | Micro Chem, USA                                    |
| PGEMA developer solution        | Micro Chem, USA                                    |
| Polydimethylsiloxane (PDMS)     | Sylgard 184, Dow Corning, USA                      |
| Triton X-100 (TX-100)           | Sigma Aldrich, USA                                 |
| Spin coater                     | Laurell Technologies, USA                          |
| Hot plate                       | Suzhou CChip Scientific Instrument Co., Ltd.       |
| Ultra violet lithography        | NXQ, USA                                           |
| Plasma cleaner                  | Suzhou CChip Scientific Instrument Co., Ltd.       |
| Upright fluorescence microscope | Olympus, Japan                                     |

**Table S3. Sequences of primers and probes used in this experiment.**

| Mutation type |                | Primer sequence (5'-3')     |
|---------------|----------------|-----------------------------|
| G12S          | Forward primer | GTAGTTGGAGCTAGTGGCGTAGGCAAG |
|               | Reverse primer | CTTGCCTACGCCACTAGCTCCAACTAC |
| G12C          | Forward primer | GTAGTTGGAGCTTGTGGCGTAGGCAAG |
|               | Reverse primer | CTTGCCTACGCCACAAGCTCCAACTAC |
| G12R          | Forward primer | GTAGTTGGAGCTCGTGGCGTAGGCAAG |
|               | Reverse primer | CTTGCCTACGCCACGAGCTCCAACTAC |
| G12D          | Forward primer | GTGGTAGTTGGAGCTGATGGCGTAGG  |
|               | Reverse primer | CCTACGCCATCAGCTCCAACTACCAC  |
| G12V          | Forward primer | GTGGTAGTTGGAGCTGTTGGCGTAGG  |
|               | Reverse primer | CCTACGCCAACAGCTCCAACTACCAC  |
| G12A          | Forward primer | GTGGTAGTTGGAGCTGCTGGCGTAGG  |
|               | Reverse primer | CCTACGCCAGCAGCTCCAACTACCAC  |

  

| Mutation type   | Reporter fluorochrome | Probe sequence (5'-3')   |
|-----------------|-----------------------|--------------------------|
| Reference probe | Cy5                   | AGAGTGCCTTGACGATACAGCTAA |
| G12S probe      | FAM                   | AGCTAGTGGCGTAG           |
| G12C probe      | HEX                   | AGCTTGTGGCGTAG           |
| G12R probe      | ROX                   | TGGAGCTCGTGGCGTAG        |
| G12D probe      | HEX                   | AGCTGATGGCGTA            |
| G12V probe      | FAM                   | AGCTGTTGGCGTAG           |
| G12A probe      | ROX                   | AGCTGCTGGCGTAGGC         |

**Table S4. Preparation of dPCR reaction for KRAS gene mutation detection.**

| Reagent component                                | Volume (35 $\mu$ L)  |
|--------------------------------------------------|----------------------|
| 10 $\times$ dPCR Buffer                          | 3.5 $\mu$ L          |
| Enzyme                                           | 1 $\mu$ L            |
| Upstream primer                                  | 1.4 $\mu$ L (400 nM) |
| Downstream primer                                | 1.4 $\mu$ L (400 nM) |
| Reference probe                                  | 1 $\mu$ L (400 nM)   |
| G12S probe                                       | 1 $\mu$ L (400 nM)   |
| G12C probe                                       | 1 $\mu$ L (400 nM)   |
| G12R probe                                       | 1 $\mu$ L (400 nM)   |
| Simulation sample (1 M template + W<br>template) | 3.5 $\mu$ L          |
| Nuclease-free water                              | 20.2 $\mu$ L         |

**Preparation of dPCR reaction for linear quantitative detection and analysis.**

| Reagent component       | Volume (35 $\mu$ L)  |
|-------------------------|----------------------|
| 10 $\times$ dPCR Buffer | 3.5 $\mu$ L          |
| Enzyme                  | 1 $\mu$ L            |
| Forward primer          | 1.4 $\mu$ L (400 nM) |
| Reverse primer          | 1.4 $\mu$ L (400 nM) |
| Reference probe         | 1 $\mu$ L (400 nM)   |
| Wild-type template      | 3.5 $\mu$ L          |
| Nuclease-free water     | 23.2 $\mu$ L         |

**Figure S1.** Gel electrophoresis diagram after PCR amplification of the constructed mutant plasmid-G12S, G12C, G12R, G12D, G12V, G12A and the wild plasmid-WT.

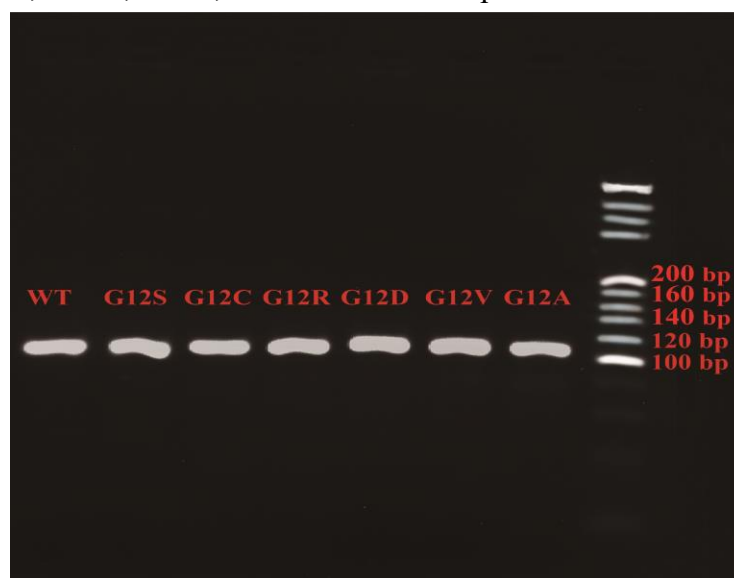

Supplement: s1 [file s1]
